# Supplementary material for: The Power of Everyday Peer Relatedness in Predicting Subjective Well-Being After School Transition
Source: Atypon-hosted journal article supplement (doi:10.1026/0049-8637/a000220), 2020-07-01
Supplement: 0049-8637_a000220_esm1.pdf [file 0049-8637_a000220_esm1.pdf]

**Electronic Supplemental Material**

**ESM 1: Table E1**

*German and English Wording of the Items*

| Scale                    | English (translated)                               | German (original)                                                             |
|--------------------------|----------------------------------------------------|-------------------------------------------------------------------------------|
| Relatedness satisfaction | Today, I got along well with the kids in my class. | Heute habe ich mich gut mit den anderen Kindern in meiner Klasse verstanden.  |
|                          | Today, the kids in my class payed attention to me. | Heute haben mich die anderen Kinder in meiner Klasse beachtet.                |
|                          | Today, I felt like the kids in my class liked me.  | Heute habe ich mich von den anderen Kindern in meiner Klasse gemocht gefühlt. |
|                          | Today, I liked playing with the kids in my class.  | Heute habe ich mit den anderen Kindern in meiner Klasse gut gespielt.         |
| Relatedness frustration  | Today, I fought with someone in my class.          | Heute habe ich mich mit jemandem aus meiner Klasse gestritten.                |
|                          | Today, someone in my class excluded me.            | Heute hat mich jemand aus meiner Klasse ausgegrenzt.                          |
|                          | Today, someone in my class was mean to me.         | Heute war jemand aus meiner Klasse gemein zu mir.                             |
|                          | Today, someone in my class picked on me.           | Heute hat mich jemand aus meiner Klasse geärgert.                             |
| Positive affect          | I usually feel good.                               | Ich bin normalerweise gut gelaunt.                                            |
|                          | I usually feel fantastic.                          | Ich fühle mich normalerweise toll.                                            |
|                          | I usually feel content.                            | Ich bin normalerweise zufrieden.                                              |
| School satisfaction      | I like going to school.                            | Ich gehe gerne in die Schule.                                                 |
|                          | I feel comfortable at our school.                  | In unserer Schule fühle ich mich wohl.                                        |
|                          | Our school seems friendly.                         | Unsere Schule wirkt freundlich.                                               |
|                          | At our school, learning is fun.                    | In unserer Schule macht das Lernen Spaß.                                      |
| Negative affect          | I usually feel unhappy.                            | Ich bin normalerweise unglücklich.                                            |
|                          | I usually feel miserable.                          | Ich fühle mich normalerweise schlecht.                                        |
|                          | I usually feel afraid.                             | Ich bin normalerweise ängstlich.                                              |
|                          | I usually feel sad.                                | Ich bin normalerweise traurig.                                                |

|                |                                                                                   |                                                                                                        |
|----------------|-----------------------------------------------------------------------------------|--------------------------------------------------------------------------------------------------------|
| School anxiety | When the teacher announces a test, I am afraid of it.                             | Wenn die Lehrerin/der Lehrer eine Klassenarbeit ankündigt, habe ich Angst davor.                       |
|                | When I am lying in bed in the evening, I sometimes worry how I will do at school. | Wenn ich abends im Bett liege, mache ich mir manchmal Sorgen, wie ich im Unterricht abschneiden werde. |
|                | Because I am scared of saying something wrong, I rarely participate at school.    | Aus Angst, etwas Falsches zu sagen, beteilige ich mich selten im Unterricht.                           |

*Note.* The items were presented in German.
