# Supplementary material for: The Power of Everyday Peer Relatedness in Predicting Subjective Well-Being After School Transition
Source: Atypon-hosted journal article supplement (doi:10.1026/0049-8637/a000220), 2020-07-01
Supplement: 0049-8637_a000220_esm3.pdf [file 0049-8637_a000220_esm3.pdf]

**ESM 3: Table E3**

*Fit of the Measurement Models With Different Levels of Measurement Invariance across Pre- and Posttest Assessments*

| Construct           | Invariance | $\chi^2$ ( <i>df</i> ) | RMSEA | CFI  | SRMR |
|---------------------|------------|------------------------|-------|------|------|
| Positive Affect     | configural | 10.75 (8)              | 0.06  | 0.99 | 0.04 |
|                     | weak       | 14.76 (10)             | 0.07  | 0.98 | 0.06 |
|                     | strong     | 17.31 (12)             | 0.06  | 0.98 | 0.07 |
|                     | strict     | 22.19 (15)             | 0.07  | 0.97 | 0.08 |
| School Satisfaction | configural | 51.11 (18)             | 0.13  | 0.91 | 0.07 |
|                     | weak       | 53.17 (21)             | 0.12  | 0.91 | 0.08 |
|                     | strong     | 59.31 (24)             | 0.12  | 0.90 | 0.08 |
|                     | strict     | 75.68 (26)             | 0.13  | 0.86 | 0.12 |
| Negative Affect     | configural | 30.30 (19)             | 0.08  | 0.98 | 0.05 |
|                     | weak       | 32.99 (22)             | 0.07  | 0.98 | 0.06 |
|                     | strong     | 39.20 (25)             | 0.07  | 0.97 | 0.07 |
|                     | strict     | 56.82 (29)             | 0.10  | 0.94 | 0.08 |
| School Anxiety      | configural | 20.95 (8)              | 0.12  | 0.86 | 0.07 |
|                     | weak       | 21.35 (10)             | 0.10  | 0.88 | 0.07 |
|                     | strong     | 24.74 (12)             | 0.10  | 0.87 | 0.08 |
|                     | strict     | 25.63 (15)             | 0.08  | 0.89 | 0.08 |

*Note.* Information Criteria are presented for the more restrictive model, respectively. *df* = degrees of freedom; AIC = Akaike Information Criterion; BIC = Bayesian Information Criterion.
