# Supplementary material for: The Power of Everyday Peer Relatedness in Predicting Subjective Well-Being After School Transition
Source: Atypon-hosted journal article supplement (doi:10.1026/0049-8637/a000220), 2020-07-01
Supplement: 0049-8637_a000220_esm4.pdf [file 0049-8637_a000220_esm4.pdf]

**ESM 4: Table E4***Tests of Measurement Invariance across Pre- and Posttest Assessments*

| Construct           | Invariance          | $\chi^2_{\text{Diff}}$ ( <i>df</i> ) |
|---------------------|---------------------|--------------------------------------|
| Positive Affect     | configural vs. weak | 4.01 (2)                             |
|                     | weak vs. strong     | 2.55 (2)                             |
|                     | strong vs. strict   | 4.88 (3)                             |
| School Satisfaction | configural vs. weak | 2.05 (3)                             |
|                     | weak vs. strong     | 6.14 (3)                             |
|                     | strong vs. strict   | 16.37* (2)                           |
| Negative Affect     | configural vs. weak | 2.69 (3)                             |
|                     | weak vs. strong     | 6.21 (3)                             |
|                     | strong vs. strict   | 17.62* (4)                           |
| School Anxiety      | configural vs. weak | 0.40 (2)                             |
|                     | weak vs. strong     | 3.39 (2)                             |
|                     | strong vs. strict   | 0.89 (3)                             |

*Note.* Information Criteria are presented for the more restrictive model, respectively. *df* = degrees of freedom; AIC = Akaike Information Criterion; BIC = Bayesian Information Criterion.

\* =  $p < .05$
