# Supplementary material for: The Power of Everyday Peer Relatedness in Predicting Subjective Well-Being After School Transition
Source: Atypon-hosted journal article supplement (doi:10.1026/0049-8637/a000220), 2020-07-01
Supplement: 0049-8637_a000220_esm5.pdf [file 0049-8637_a000220_esm5.pdf]

**ESM 5: Table E5***Fit of the Final Measurement Models*

|                                | Construct                 | Invariance pre-<br>and posttest | $\chi^2$ | <i>df</i> | RMSEA | CFI  | SRMR |
|--------------------------------|---------------------------|---------------------------------|----------|-----------|-------|------|------|
| Well-Being/<br>Ill-Being       | Positive Affect           | strict                          | 22.19    | 15        | .07   | .97  | .08  |
|                                | School Satisfaction       | strong                          | 59.31    | 24        | .12   | .90  | .08  |
|                                | Negative Affect           | strong                          | 39.20    | 25        | .07   | .97  | .07  |
|                                | School Anxiety            | strict                          | 25.63    | 15        | .08   | .89  | .08  |
| Adjustment/<br>Psychopathology | Emotional Symptoms        | -                               | 4.29     | 5         | .00   | 1.00 | .02  |
|                                | Conduct Problems          | -                               | 0.53     | 2         | .00   | 1.00 | .01  |
|                                | Peer Problems             | -                               | 6.78     | 5         | .06   | .99  | .03  |
|                                | Hyperactivity-Inattention | -                               | 5.16     | 4         | .05   | 1.00 | .02  |
|                                | Prosocial Behavior        | -                               | 2.83     | 5         | .00   | 1.00 | .02  |

*Note.* Adjustment and psychopathology were assessed at posttest only, which is why there were no tests of invariance. *df* = degrees of freedom; RMSEA = Root Mean Square Error of Approximation; CFI = Comparative Fit Index; SRMR = Standardized Root Mean Square Residual.
