# Supplementary material for: The Power of Everyday Peer Relatedness in Predicting Subjective Well-Being After School Transition
Source: Atypon-hosted journal article supplement (doi:10.1026/0049-8637/a000220), 2020-07-01
Supplement: 0049-8637_a000220_esm6.pdf [file 0049-8637_a000220_esm6.pdf]

**ESM 6: Figure E1**

*Generic Structural Model*

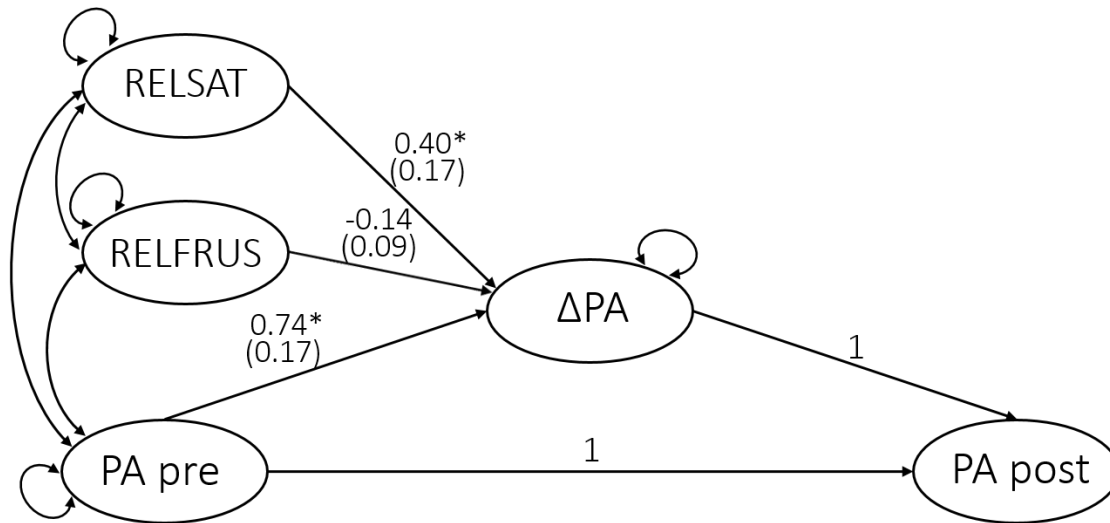

*Note.* Structural model for predicting residualized change in positive affect from pre- to posttest by relatedness satisfaction and relatedness frustration. Measurement models at Levels 1 and 2 were omitted. Ovals represent latent variables. PA pre = positive affect assessed at pretest; PA post = positive affect assessed at posttest; ΔPA = change in positive affect from pre- to posttest; RELSAT = relatedness satisfaction; RELFRUS = relatedness frustration.

**Reference**

Geldhof, G. J., Preacher, K. J., & Zyphur, M. J. (2014). Reliability estimation in a multilevel confirmatory factor analysis framework. *Psychological Methods, 19*(1), 72–91.

<https://doi.org/10.1037/a0032138>
